# Supplementary material for: GIP receptor agonism improves dyslipidemia and atherosclerosis independently of body weight loss in preclinical mouse model for cardio-metabolic disease
Source: Springer Nature journal article supplement (doi:10.1186/s12933-023-01940-2), 2023-08-17
Supplement: MOESM3 [file 25932740]

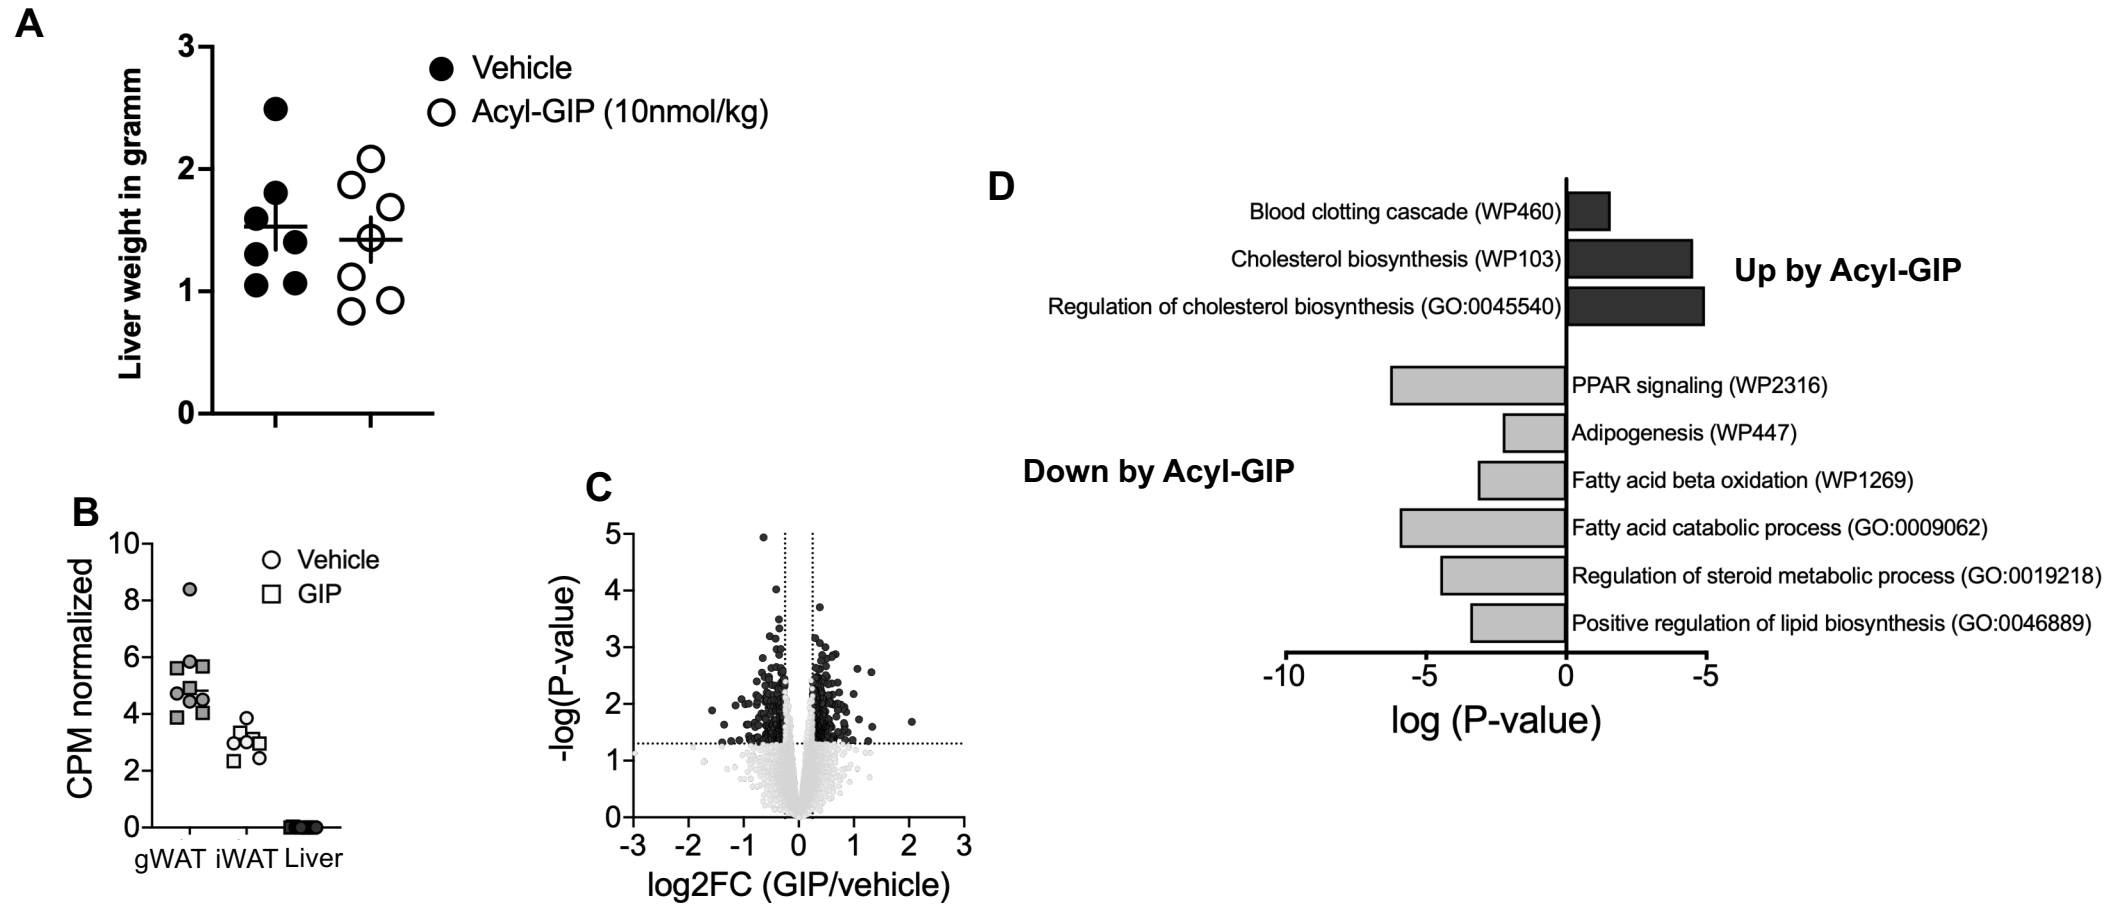

**Figure S1:** (A) Liver weights of vehicle and Acyl-GIP treated male LDLR<sup>-/-</sup> mice. (B) Relative gWAT, iWAT and liver GIPR gene expression of vehicle and Acyl-GIP treated LDLR<sup>-/-</sup> mice (gWAT n=5; iWAT n=4; liver n= 4). (C) Volcano plot showing differential expression and its significance ( $-\log_{10}(\text{p-Value})$ , limma-trend) of chronic Acyl-GIP effects on liver. (D) Pathway regulation in livers of male LDLR<sup>-/-</sup> mice after Acyl-GIP treatment compared to vehicle treatment.
